## Correction: Fish Invasions in the World's River Systems: When Natural Processes Are Blurred by Human Activities

Fabien Leprieur, Olivier Beauchard, Simon Blanchet, Thierry Oberdorff, Sébastien Brosse

Correction for:

Leprieur F, Beauchard O, Blanchet S, Oberdorff T, Brosse S (2008) Fish invasions in the world's river systems: When natural processes are blurred by human activities. *PLoS Biol* 6(2): e28. doi:10.1371/journal.pbio.0060028

The content of the published Dataset S1 was incorrect, due to a procedural error when the file was created. A corrected version of this file is now available. The figures and analysis presented elsewhere in the research article are not affected, as these were created from the master copy of the data rather than the supporting file.

### Dataset S1.

Names and Invasion Levels of the 1,055 River Basins

The three invasion levels are those used in Figure 1A (i.e., the percentage of non-native species per basin). (i) [0%–5%]; (ii) [5%–25%]; (iii) [25%–95%]. Longitude and latitude at the river mouth was also provided for the 1,055 river basins.

Found at doi:10.1371/journal.pbio.0060322.sd001 (170 KB XLS).

Citation: Leprieur F, Beauchard O, Blanchet S, Oberdorff T, Brosse S (2008) Correction: Fish Invasions in the World's River Systems: When Natural Processes Are Blurred by Human Activities. *PLoS Biol* 6(12): e322. doi:10.1371/journal.pbio.0060322

Received: November 6, 2008; Accepted: November 6, 2008; Published: December 23, 2008

Copyright: © 2008 Leprieur et al. This is an open-access article distributed under the terms of the Creative Commons Attribution License, which permits unrestricted use, distribution, and reproduction in any medium, provided the original author and source are credited.

## Correction: Survival of Migrating Salmon Smolts in Large Rivers With and Without Dams

David W. Welch, Erin L. Rechisky, Michael C. Melnychuk, Aswea D. Porter, Carl J. Walters, Shaun Clements, Benjamin J. Clemens, R. Scott McKinley, Carl Schreck

Correction for:

Welch DW, Rechisky EL, Melnychuk MC, Porter AD, Walters CJ, et al. (2008) Survival of migrating salmon smolts in large rivers with and without dams. *PLoS Biol* 6(10): e265 doi:10.1371/journal.pbio.0060265

In the legend below Table 1, the reference given at the end of the second sentence is incorrect. The sentence should read:

"Annual survival (*S*) to the lowest listening line in the Fraser River, whole-river survival in the Columbia River (2006), and associated detection efficiencies (*p*) were calculated using the CJS model and program MARK [28]"

Citation: Welch DW, Rechisky EL, Melnychuk MC, Porter AD, Walters CJ, et al. (2008) Correction: Survival of Migrating Salmon Smolts in Large Rivers With and Without Dams. *PLoS Biol* 6(12): e314. doi:10.1371/journal.pbio.0060314

Received: October 30, 2008; Accepted: October 30, 2008; Published: December 23, 2008

This is an open-access article distributed under the terms of the Creative Commons Public Domain declaration, which stipulates that, once placed in the public domain, this work may be freely reproduced, distributed, transmitted, modified, built upon, or otherwise used by anyone for any lawful purpose.
